# Supplementary material for: Associations Between Early Life Adversity, Reproduction-Oriented Life Strategy, and Borderline Personality Disorder
Source: PubMed Central journal article supplement (PMC10134045; doi:10.1001/jamapsychiatry.2023.0694), 2023-04-26
Supplement: jamapsychiatry-e230694-s002.pdf [file jamapsychiatry-e230694-s002.pdf]

## Data Sharing Statement

Baptista. Associations Between Early Life Adversity, Reproduction-Oriented Life Strategy, and Borderline Personality Disorder. *JAMA Psychiatry*. Published April 26, 2023.  
doi:10.1001/jamapsychiatry.2023.0694

### Data

**Data available:** No
